# Supplementary material
Source: PubMed Central journal article supplement (PMC6098737)
Supplement: NIHMS937693-supplement-supplement_1.pdf [file NIHMS937693-supplement-supplement_1.pdf]

**Supplemental Table 1. Sensitivity Analysis: Characteristics of the population at enrollment comparing patients reporting not drinking vs. drinking monthly or less vs. 2-4 times per month or more**

| Characteristic                    | Drinking status        |                               |                                             | P<br>(Monthly or less<br>vs. 2-4 times per<br>month or more) |
|-----------------------------------|------------------------|-------------------------------|---------------------------------------------|--------------------------------------------------------------|
|                                   | Non-drinker<br>(N=117) | Monthly or<br>less<br>(N=131) | 2-4 times per<br>month or<br>more<br>(N=37) |                                                              |
| <b>Demographics</b>               |                        |                               |                                             |                                                              |
| Age at biopsy, years – mean ± SD  | 48.5 ± 10.7            | 45.6 ± 11.0                   | 47.1 ± 11.7                                 | 0.45                                                         |
| Female sex – N (%)                | 89 (76.1)              | 91 (69.5)                     | 19 (51.4)                                   | 0.05                                                         |
| Hispanic – N (%)                  | 11 (9.4)               | 13 (9.9)                      | 4 (10.8)                                    | 1.00                                                         |
| Race, White – N (%)               | 89 (76.1)              | 110 (84.0)                    | 34 (91.9)                                   | 0.72                                                         |
| Ever smoked – N (%)               | 36 (30.8)              | 52 (39.7)                     | 15 (40.5)                                   | 0.93                                                         |
| Current smoker – N (%)            | 9 (7.7)                | 12 (9.2)                      | 0 (0.0)                                     | 0.07                                                         |
| <b>Liver tests – Median (IQR)</b> |                        |                               |                                             |                                                              |
| AST, U/L                          | 42 (31-59)             | 43 (30-69)                    | 49 (33-61)                                  | 0.82                                                         |
| ALT, U/L                          | 57 (39-78)             | 62 (43-99)                    | 65 (55-82)                                  | 0.90                                                         |
| Alkaline phosphatase, U/L         | 86 (70-106)            | 79 (66-94)                    | 64 (55-82)                                  | 0.005                                                        |
| GGT, U/L                          | 40 (29-79)             | 48 (28-84)                    | 43 (26-64)                                  | 0.56                                                         |
| <b>Histology – N (%)</b>          |                        |                               |                                             |                                                              |
| Steatosis grade                   |                        |                               |                                             |                                                              |
| 1 - <33%                          | 54 (46.2)              | 43 (32.8)                     | 13 (35.1)                                   | 0.93                                                         |
| 2 – 34-66%                        | 34 (29.1)              | 47 (35.9)                     | 12 (32.4)                                   |                                                              |
| 3 - >66%                          | 29 (24.8)              | 41 (31.3)                     | 12 (32.4)                                   |                                                              |
| Lobular inflammation              |                        |                               |                                             |                                                              |
| 0 – none                          | 1 (0.9)                | -                             | -                                           | 0.06                                                         |
| 1 - <2                            | 58 (49.6)              | 58 (44.3)                     | 21 (56.8)                                   |                                                              |
| 2 - 2-4                           | 42 (35.9)              | 56 (42.8)                     | 8 (21.6)                                    |                                                              |
| 3 - >4                            | 16 (13.7)              | 17 (13.0)                     | 8 (21.6)                                    |                                                              |
| Chronic portal inflammation       |                        |                               |                                             |                                                              |
| 0 – none                          | 16 (13.7)              | 19 (14.5)                     | 9 (24.3)                                    | 0.33                                                         |
| 1 – mild                          | 72 (61.5)              | 85 (64.9)                     | 20 (54.1)                                   |                                                              |
| 2 – more than mild                | 29 (24.8)              | 27 (20.6)                     | 8 (21.6)                                    |                                                              |
| Ballooning                        |                        |                               |                                             |                                                              |
| 0 – none                          | 26 (22.2)              | 41 (31.3)                     | 13 (35.1)                                   | 0.91                                                         |
| 1 – few                           | 34 (29.1)              | 37 (28.2)                     | 10 (27.0)                                   |                                                              |
| 2 – many                          | 57 (48.7)              | 53 (40.5)                     | 14 (37.8)                                   |                                                              |
| Fibrosis stage                    |                        |                               |                                             |                                                              |
| 0 – none                          | 25 (21.4)              | 32 (24.8)                     | 8 (21.6)                                    | 0.60                                                         |
| 1a/1b/1c                          | 35 (29.9)              | 41 (31.8)                     | 14 (37.8)                                   |                                                              |
| 2                                 | 28 (23.9)              | 23 (17.8)                     | 9 (24.3)                                    |                                                              |
| 3 – bridging                      | 24 (20.5)              | 29 (22.5)                     | 6 (16.2)                                    |                                                              |
| 4 – cirrhosis                     | 5 (4.3)                | 4 (3.1)                       | 0 (0.0)                                     |                                                              |
| Iron grade                        |                        |                               |                                             |                                                              |
| 0 – absent                        | 86 (81.1)              | 95 (79.8)                     | 22 (68.8)                                   | 0.49                                                         |

| Characteristic                         | Drinking status        |                               |                                             | P<br>(Monthly or less<br>vs. 2-4 times per<br>month or more) |
|----------------------------------------|------------------------|-------------------------------|---------------------------------------------|--------------------------------------------------------------|
|                                        | Non-drinker<br>(N=117) | Monthly or<br>less<br>(N=131) | 2-4 times per<br>month or<br>more<br>(N=37) |                                                              |
| 1 – barely discernible, 20x            | 17 (16.0)              | 14 (11.8)                     | 5 (15.6)                                    |                                                              |
| 2 – discrete granules resolved,<br>10x | 3 (2.8)                | 9 (7.6)                       | 4 (12.5)                                    |                                                              |
| 3 – discrete granules resolved,<br>4x  | 0 (0.0)                | 1 (0.8)                       | 1 (3.1)                                     |                                                              |
| NAFLD activity score                   |                        |                               |                                             |                                                              |
| <4                                     | 30 (25.6)              | 30 (22.9)                     | 11 (29.7)                                   | 0.39                                                         |
| ≥4                                     | 87 (74.4)              | 101 (77.1)                    | 26 (70.3)                                   |                                                              |
| NAS – mean, SD                         | 4.7 ± 1.5              | 4.8 ± 1.6                     | 4.6 ± 1.8                                   | 0.68                                                         |
| Diagnosis                              |                        |                               |                                             |                                                              |
| 0 – NAFLD, not NASH                    | 19 (16.2)              | 25 (19.1)                     | 10 (27.0)                                   | 0.15                                                         |
| 1a/1b – Borderline                     | 12 (10.3)              | 33 (25.2)                     | 4 (10.8)                                    |                                                              |
| 2 – Definite NASH                      | 86 (73.5)              | 73 (55.7)                     | 23 (62.2)                                   |                                                              |
| Biopsy length, mm – mean, SD           | 19.9 ± 10.5            | 18.3 ± 8.7                    | 17.0 ± 8.4                                  | 0.37                                                         |
| Range, mm                              | 3-66                   | 2-47                          | 4-40                                        |                                                              |
| <b>Lipid panel – Median (IQR)</b>      |                        |                               |                                             |                                                              |
| Total cholesterol, mg/dL               | 192 (170-231)          | 196 (170-220)                 | 184 (164-230)                               | 0.91                                                         |
| HDL cholesterol, mg/dL                 | 44 (37-50)             | 41 (35-50)                    | 48 (40-53)                                  | 0.05                                                         |
| LDL cholesterol, mg/dL                 | 117 (94-150)           | 122 (99-141)                  | 122 (90-143)                                | 0.67                                                         |
| Triglycerides, mg/dL                   | 146 (113-208)          | 154 (109-206)                 | 136 (97-188)                                | 0.42                                                         |
| <b>Metabolic factors</b>               |                        |                               |                                             |                                                              |
| Weight, kg – mean, SD                  | 96.0 ± 22.2            | 99.1 ± 20.4                   | 91.3 ± 14.8                                 | 0.09                                                         |
| BMI, kg/m <sup>2</sup>                 | 35.2 ± 7.4             | 35.3 ± 6.6                    | 31.5 ± 4.7                                  | 0.003                                                        |
| Fasting glucose, mg/dL                 | 96 (87-117)            | 99 (88-116)                   | 100 (91-108)                                | 0.83                                                         |
| Insulin, μU/mL                         | 17 (13-27)             | 18 (13-29)                    | 17 (12-31)                                  | 0.91                                                         |
| HOMA-IR                                | 4.5 (2.8-7.2)          | 4.5 (3.2-7.6)                 | 4.5 (2.9-7.6)                               | 0.97                                                         |
| <b>Comorbidities</b>                   |                        |                               |                                             |                                                              |
| Diabetes – N (%)                       | 44 (37.6)              | 44 (33.6)                     | 10 (27.0)                                   | 0.55                                                         |
| Hypertension – N (%)                   | 67 (57.3)              | 58 (44.3)                     | 20 (54.1)                                   | 0.35                                                         |
| Hyperlipidemia – N (%)                 | 70 (59.8)              | 66 (50.4)                     | 17 (46.0)                                   | 0.71                                                         |
| Metabolic syndrome – N (%)             | 81 (70.4)              | 93 (71.5)                     | 21 (56.8)                                   | 0.11                                                         |
| <b>Genotype (N=155) – N (%)</b>        |                        |                               |                                             |                                                              |
| PNPLA3 rs738409                        |                        |                               |                                             | 1.00                                                         |
| CC                                     | 16 (22.9%)             | 22 (33.3%)                    | 6 (31.6%)                                   |                                                              |
| GC                                     | 30 (42.9%)             | 24 (36.4%)                    | 7 (36.8%)                                   |                                                              |
| GG                                     | 24 (34.3%)             | 20 (30.3%)                    | 6 (31.6%)                                   |                                                              |

**Supplemental Table 2. Logistic regression analysis of modest drinking vs. non-drinking among patients with NAFLD (N=264)**

|                                   | Independent discriminators for modest drinking vs. non-drinking: Full model |             |        | Independent discriminators for modest drinking vs. non-drinking: Reduced model* |             |        |
|-----------------------------------|-----------------------------------------------------------------------------|-------------|--------|---------------------------------------------------------------------------------|-------------|--------|
|                                   | Odds ratio†                                                                 | 95% CI      | P      | Odds ratio†                                                                     | 95% CI      | P      |
| <b>Demographics</b>               |                                                                             |             | 0.007  |                                                                                 |             |        |
| Age at biopsy (years)             | 0.96                                                                        | 0.93 - 0.99 | 0.02   | 0.97                                                                            | 0.95 - 1.00 | 0.03   |
| Female vs. male                   | 0.80                                                                        | 0.37 - 1.76 | 0.58   |                                                                                 |             |        |
| Hispanic vs. non-Hispanic         | 1.22                                                                        | 0.38 - 3.93 | 0.74   |                                                                                 |             |        |
| White vs. non-white               | 3.32                                                                        | 1.49 - 7.37 | 0.003  | 2.50                                                                            | 1.22 - 5.12 | 0.01   |
| Ever smoked vs. never smoked      | 2.14                                                                        | 1.16 - 3.98 | 0.02   | 1.97                                                                            | 1.11 - 3.49 | 0.02   |
| <b>Liver enzymes</b>              |                                                                             |             | 0.008  |                                                                                 |             |        |
| AST (per 10 U/L)                  | 0.98                                                                        | 0.87 - 1.10 | 0.77   |                                                                                 |             |        |
| ALT (per 10 U/L)                  | 1.06                                                                        | 0.95 - 1.19 | 0.31   | 1.05                                                                            | 0.99 - 1.12 | 0.12   |
| Alkaline phosphatase (per 10 U/L) | 0.80                                                                        | 0.71 - 0.91 | <0.001 | 0.82                                                                            | 0.74 - 0.91 | <0.001 |
| GGT (per 10 U/L)                  | 1.05                                                                        | 0.98 - 1.12 | 0.17   | 1.06                                                                            | 0.99 - 1.12 | 0.09   |
| <b>Histology</b>                  |                                                                             |             | 0.01   |                                                                                 |             |        |
| Steatosis grade                   |                                                                             |             | 0.03   |                                                                                 |             | 0.03   |
| 1 - <33% (ref)                    | 1.00                                                                        |             |        | 1.00                                                                            |             |        |
| 2 - 34-66%                        | 2.44                                                                        | 1.22 - 4.87 |        | 2.06                                                                            | 1.09 - 3.90 |        |
| 3 - >66%                          | 1.96                                                                        | 0.94 - 4.10 |        | 2.00                                                                            | 1.00 - 3.99 |        |
| Lobular inflammation              |                                                                             |             | 0.75   |                                                                                 |             |        |
| 1 - <2 (ref)                      | 1.00                                                                        |             |        |                                                                                 |             |        |
| 2 - 2-4                           | 0.89                                                                        | 0.45 - 1.78 |        |                                                                                 |             |        |
| 3 - >4                            | 1.29                                                                        | 0.47 - 3.54 |        |                                                                                 |             |        |
| Ballooning                        |                                                                             |             | 0.57   |                                                                                 |             |        |
| 0 - None (ref)                    | 1.00                                                                        |             |        |                                                                                 |             |        |
| 1 - Few                           | 1.96                                                                        | 0.54 - 7.08 |        |                                                                                 |             |        |
| 2 - Many                          | 1.81                                                                        | 0.38 - 8.70 |        |                                                                                 |             |        |
| Portal inflammation               |                                                                             |             | 0.93   |                                                                                 |             |        |
| 0 - None (ref)                    | 1.00                                                                        |             |        |                                                                                 |             |        |
| 1- Mild                           | 0.90                                                                        | 0.37 - 2.17 |        |                                                                                 |             |        |

|                                | Independent discriminators for<br>modest drinking vs. non-<br>drinking: Full model |              |      | Independent discriminators for<br>modest drinking vs. non-<br>drinking: Reduced model* |             |       |
|--------------------------------|------------------------------------------------------------------------------------|--------------|------|----------------------------------------------------------------------------------------|-------------|-------|
|                                | Odds<br>ratio <sup>†</sup>                                                         | 95% CI       | P    | Odds<br>ratio <sup>†</sup>                                                             | 95% CI      | P     |
| 2 - More than mild             | 0.81                                                                               | 0.27 - 2.43  |      |                                                                                        |             |       |
| Fibrosis stage                 |                                                                                    |              | 0.54 |                                                                                        |             |       |
| 0 - None (ref)                 | 1.00                                                                               |              |      |                                                                                        |             |       |
| 1a/1b/1c                       | 2.25                                                                               | 0.88 - 5.79  |      |                                                                                        |             |       |
| 2                              | 1.92                                                                               | 0.66 - 5.60  |      |                                                                                        |             |       |
| 3 - bridging                   | 2.33                                                                               | 0.71 - 7.61  |      |                                                                                        |             |       |
| 4 - cirrhosis                  | 2.77                                                                               | 0.44 - 17.48 |      |                                                                                        |             |       |
| Diagnosis                      |                                                                                    |              |      |                                                                                        |             |       |
| Definite NASH                  | 0.19                                                                               | 0.05 - 0.71  | 0.01 | 0.41                                                                                   | 0.23 - 0.76 | 0.004 |
| <b>Lipids</b>                  |                                                                                    |              | 0.31 |                                                                                        |             |       |
| HDL cholesterol (per 10 mg/dL) | 1.22                                                                               | 0.86 - 1.73  | 0.27 |                                                                                        |             |       |
| LDL cholesterol (per 10 mg/dL) | 0.99                                                                               | 0.90 - 1.09  | 0.82 |                                                                                        |             |       |
| Triglycerides (per 50 mg/dL)   | 0.86                                                                               | 0.69 - 1.06  | 0.15 |                                                                                        |             |       |
| <b>Metabolic factors</b>       |                                                                                    |              | 0.26 |                                                                                        |             |       |
| BMI                            | 0.97                                                                               | 0.92 - 1.02  | 0.23 |                                                                                        |             |       |
| Insulin (per 10 μU/mL)         | 1.09                                                                               | 0.96 - 1.24  | 0.19 |                                                                                        |             |       |
| Glucose (per 10 mg/dL)         | 1.11                                                                               | 0.97 - 1.26  | 0.14 |                                                                                        |             |       |
| Metabolic syndrome             | 1.41                                                                               | 0.61 - 3.28  | 0.43 |                                                                                        |             |       |
| <b>Comorbidities</b>           |                                                                                    |              | 0.43 |                                                                                        |             |       |
| Diabetes                       | 1.24                                                                               | 0.58 - 2.63  | 0.58 |                                                                                        |             |       |
| Hypertension                   | 0.78                                                                               | 0.41 - 1.51  | 0.46 |                                                                                        |             |       |
| Hyperlipidemia                 | 0.72                                                                               | 0.38 - 1.34  | 0.30 |                                                                                        |             |       |

\*Reduced model selected by AIC with forward selection from a logistic regression model that included all candidate variables listed in the table. Minimum AIC=331.8. N=264 due to missing values.

<sup>†</sup> Higher odds ratios favor modest drinkers.

**Supplemental Table 3. Sensitivity Analysis: Change in histologic features from enrollment to follow-up comparing patients reporting drinking monthly or less vs. 2-4 times per month or more**

|                                   | Drinks monthly or less (N=248) | Drinks 2-4 times per month or more (N=37) | Differences in adjusted mean changes from baseline or odds ratio (95% CI)<br>Monthly or less drinker vs. 2-4 times/month or more | P    |
|-----------------------------------|--------------------------------|-------------------------------------------|----------------------------------------------------------------------------------------------------------------------------------|------|
| <b>Steatosis</b>                  |                                |                                           |                                                                                                                                  |      |
| Change in score                   | -0.40 (-0.50, -0.31)           | -0.20 (-0.45, 0.05)                       | 0.20 (-0.07, 0.47)                                                                                                               | 0.14 |
| Patients improved                 | 112 (45%)                      | 13 (35%)                                  | 0.66 (0.32, 1.35)                                                                                                                | 0.25 |
| <b>Lobular inflammation</b>       |                                |                                           |                                                                                                                                  |      |
| Change in score                   | -0.27 (-0.36, -0.19)           | -0.14 (-0.35, 0.07)                       | 0.13 (-0.10, 0.36)                                                                                                               | 0.25 |
| Patients improved                 | 91 (37%)                       | 11 (30%)                                  | 0.73 (0.34, 1.55)                                                                                                                | 0.41 |
| <b>Ballooning</b>                 |                                |                                           |                                                                                                                                  |      |
| Change in score                   | -0.19 (-0.29, -0.09)           | -0.22 (-0.47, 0.04)                       | -0.03 (-0.30, 0.25)                                                                                                              | 0.84 |
| Patients improved                 | 80 (32%)                       | 11 (30%)                                  | 0.89 (0.42, 1.89)                                                                                                                | 0.76 |
| <b>Portal inflammation</b>        |                                |                                           |                                                                                                                                  |      |
| Change in score                   | 0.17 (0.10, 0.25)              | -0.07 (-0.26, 0.12)                       | -0.24 (-0.45, -0.03)                                                                                                             | 0.02 |
| Patients improved                 | 37 (15%)                       | 8 (22%)                                   | 1.57 (0.66, 3.69)                                                                                                                | 0.31 |
| <b>Fibrosis</b>                   |                                |                                           |                                                                                                                                  |      |
| Change in score                   | 0.08 (-0.05, 0.21)             | 0.04 (-0.30, 0.37)                        | -0.04 (-0.40, 0.32)                                                                                                              | 0.83 |
| Patients improved                 | 67 (27%)                       | 9 (24%)                                   | 0.85 (0.38, 1.90)                                                                                                                | 0.70 |
| <b>NAFLD Activity Score (NAS)</b> |                                |                                           |                                                                                                                                  |      |
| Change in score                   | -0.87 (-1.08, -0.65)           | -0.55 (-1.09, 0.001)                      | 0.32 (-0.27, 0.91)                                                                                                               | 0.29 |
| Patients improved                 | 144 (58%)                      | 16 (43%)                                  | 0.55 (0.27, 1.11)                                                                                                                | 0.09 |
| <b>Resolution of NASH</b>         | 27 (17%)                       | 3 (13%)                                   | 0.73 (0.20, 2.64)                                                                                                                | 0.64 |

Changes in scores are presented as adjusted means (95% confidence intervals); P-values and mean changes from baseline were calculated using ANCOVA, regressing change from baseline to time of last biopsy on baseline drinking status and baseline value of the outcome; odds ratios and p-values were calculated using logistic regression models.

Improvement defined as a 1 point or more decrease in the histological grade or score.

**Supplemental Table 4. Longitudinal change in histologic and clinical features from enrollment to follow-up biopsy in patients with the GG and GC allele (rs738409)**

|                                   | <b>Non-drinker<br/>(N=54)</b> | <b>Modest-drinker<br/>(N=57)</b> | <b>Differences in mean<br/>changes from<br/>baseline or odds<br/>ratio (95% CI)<br/>Modest-drinker vs.<br/>non-drinker</b> | <b>P</b> |
|-----------------------------------|-------------------------------|----------------------------------|----------------------------------------------------------------------------------------------------------------------------|----------|
| <b>Histologic Features</b>        |                               |                                  |                                                                                                                            |          |
| <b>Steatosis</b>                  |                               |                                  |                                                                                                                            |          |
| Change in score                   | -0.39 (-0.57, -0.20)          | -0.52 (-0.71, -0.34)             | -0.13 (-0.40, 0.13)                                                                                                        | 0.32     |
| No change (ref.)                  | 26 (48%)                      | 20 (35%)                         | 1.00                                                                                                                       |          |
| Improved                          | 22 (41%)                      | 33 (58%)                         | 1.95 (0.88, 4.31)                                                                                                          | 0.10     |
| Worsened                          | 6 (11%)                       | 4 (7%)                           | 0.87 (0.22, 3.49)                                                                                                          | 0.84     |
| <b>Lobular inflammation</b>       |                               |                                  |                                                                                                                            |          |
| Change in score                   | -0.05 (-0.22, 0.11)           | -0.49 (-0.65, -0.34)             | -0.44 (-0.66, -0.21)                                                                                                       | <0.001   |
| No change (ref.)                  | 26 (48%)                      | 26 (46%)                         | 1.00                                                                                                                       |          |
| Improved                          | 16 (30%)                      | 26 (46%)                         | 1.63 (0.71, 3.71)                                                                                                          | 0.25     |
| Worsened                          | 12 (22%)                      | 5 (9%)                           | 0.42 (0.13, 1.35)                                                                                                          | 0.15     |
| <b>Ballooning</b>                 |                               |                                  |                                                                                                                            |          |
| Change in score                   | -0.13 (-0.35, 0.10)           | -0.20 (-0.42, 0.02)              | -0.07 (-0.39, 0.25)                                                                                                        | 0.68     |
| No change (ref.)                  | 22 (41%)                      | 29 (51%)                         | 1.00                                                                                                                       |          |
| Improved                          | 19 (35%)                      | 14 (25%)                         | 0.56 (0.23, 1.35)                                                                                                          | 0.67     |
| Worsened                          | 13 (24%)                      | 14 (25%)                         | 0.82 (0.32, 2.08)                                                                                                          | 0.20     |
| <b>Portal inflammation</b>        |                               |                                  |                                                                                                                            |          |
| Change in score                   | 0.28 (0.14, 0.43)             | 0.03 (-0.11, 0.17)               | -0.25 (-0.46, -0.05)                                                                                                       | 0.02     |
| No change (ref.)                  | 30 (56%)                      | 28 (49%)                         | 1.00                                                                                                                       |          |
| Improved                          | 5 (9%)                        | 13 (23%)                         | 2.79 (0.88, 8.82)                                                                                                          | 0.08     |
| Worsened                          | 19 (35%)                      | 16 (28%)                         | 0.90 (0.39, 2.09)                                                                                                          | 0.81     |
| <b>Fibrosis</b>                   |                               |                                  |                                                                                                                            |          |
| Change in score                   | 0.28 (-0.01, 0.58)            | 0.10 (-0.19, 0.40)               | -0.18 (-0.61, 0.24)                                                                                                        | 0.40     |
| No change (ref.)                  | 15 (28%)                      | 23 (42%)                         | 1.00                                                                                                                       |          |
| Improved                          | 16 (30%)                      | 13 (24%)                         | 0.53 (0.20, 1.41)                                                                                                          | 0.20     |
| Worsened                          | 23 (43%)                      | 19 (35%)                         | 0.54 (0.22, 1.31)                                                                                                          | 0.17     |
| <b>NAFLD Activity Score (NAS)</b> |                               |                                  |                                                                                                                            |          |
| Change in score                   | -0.68 (-1.12, -0.24)          | -1.11 (-1.54, -0.68)             | -0.43 (-1.04, 0.18)                                                                                                        | 0.17     |
| No change (ref.)                  | 4 (7%)                        | 18 (32%)                         | 1.00                                                                                                                       |          |
| Improved                          | 32 (59%)                      | 32 (56%)                         | 0.22 (0.07, 0.73)                                                                                                          | 0.01     |
| Worsened                          | 18 (33%)                      | 7 (12%)                          | 0.09 (0.02, 0.35)                                                                                                          | 0.001    |
| Resolution of NASH                | 11 (26%)                      | 4 (14%)                          | 0.47 (0.13, 1.66)                                                                                                          | 0.24     |

**Clinical Features**

|                           |                         |                         |                       |      |
|---------------------------|-------------------------|-------------------------|-----------------------|------|
| AST, U/L                  | -6.27 (-14.79, 2.26)    | -0.68 (-8.90, 7.54)     | 5.59 (-6.25, 17.43)   | 0.35 |
| ALT, U/L                  | -21.10 (-29.11, -13.08) | -16.81 (-24.53, -9.08)  | 4.29 (-6.84, 15.42)   | 0.45 |
| Alkaline phosphatase, U/L | -22.68 (-31.31, -14.06) | -19.12 (-27.43, -10.80) | 3.57 (-8.50, 15.63)   | 0.56 |
| GGT, U/L                  | -0.88 (-10.14, 8.38)    | -6.75 (-15.51, 2.00)    | -5.87 (-18.67, 6.93)  | 0.37 |
| Homa-IR                   | 0.79 (-1.58, 3.17)      | 0.33 (-1.97, 2.64)      | -0.46 (-3.78, 2.86)   | 0.78 |
| Total cholesterol, mg/dL  | -19.1 (-29.11, -9.09)   | -14.03 (-23.77, -4.29)  | 5.07 (-8.93, 19.07)   | 0.47 |
| HDL, mg/dL                | 0.69 (-1.58, 2.96)      | -1.93 (-4.14, 0.28)     | -2.62 (-5.79, 0.55)   | 0.10 |
| LDL, mg/dL                | -15.00 (-24.16, -5.84)  | -10.71 (-19.70, -1.72)  | 4.29 (-8.56, 17.14)   | 0.51 |
| Triglycerides, mg/dL      | -27.75 (-61.78, 6.28)   | -1.59 (-34.71, 31.54)   | 26.17 (-21.33, 73.66) | 0.28 |
| BMI, kg/m <sup>2</sup>    | -0.11 (-0.93, 0.71)     | 0.61 (-0.21, 1.42)      | 0.71 (-0.44, 1.87)    | 0.22 |

---

Changes in scores are presented as adjusted means (adjusted for the baseline value) and 95% confidence intervals; P-values and mean changes from baseline were calculated using ANCOVA, regressing change from baseline to time of last biopsy on baseline drinking status and baseline value of the outcome; odds ratios and p-values were calculated using logistic regression models. Improvement defined as a 1 point or more decrease in the histological grade or score.
